# Supplementary material for: A three-dimensional interconnected nitrogen-doped graphene-like porous carbon-modified separator for high-performance Li–S batteries
Source: Royal Society of Chemistry journal article supplement (doi:10.1039/d0se00620c), 2020-01-01
Supplement: d0se00620c1.pdf [file d0se00620c1.pdf]

## Supporting Information

# A Three-Dimensional Interconnected Nitrogen-Doped Graphene-Like Porous Carbon-Modified Separator for High-Performance Li-S Batteries

Wen Huang<sup>a</sup>, Daqian Ruan<sup>b</sup>, Hui Chen<sup>a</sup>, Kai Hu<sup>a</sup>, Juan Wen<sup>b</sup>, Wenqi Yan<sup>b</sup>, Yusong Zhu<sup>a</sup>, Yi Zhang<sup>a</sup>, Nengfei Yu<sup>a,\*</sup> and Yuping Wu<sup>a,b,\*</sup>

<sup>a</sup> *School of Energy Science and Engineering, Nanjing Tech University, Nanjing 211816, China.*

<sup>b</sup> *Institute of Advanced Materials (IAM), Nanjing Tech University, Nanjing 210009, China*

\*Corresponding author.

*E-mail address: E-mail: [yunf@njtech.edu.cn](mailto:yunf@njtech.edu.cn) (N. Yu); [wuyyp@fudan.edu.cn](mailto:wuyyp@fudan.edu.cn) (Y. Wu)*

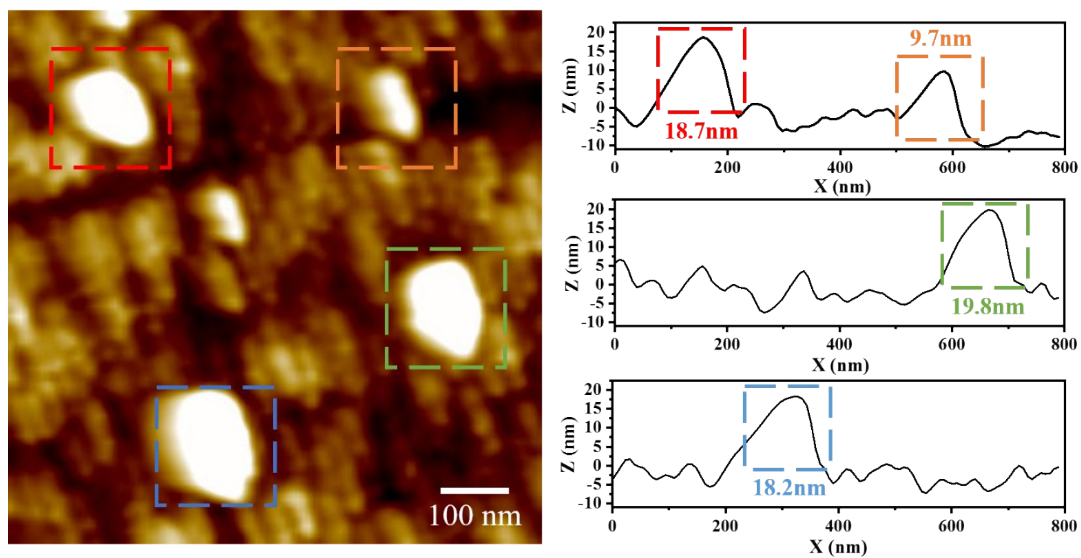

**Fig. S1.** The atomic force micrograph and thickness distribution of N-GCs.

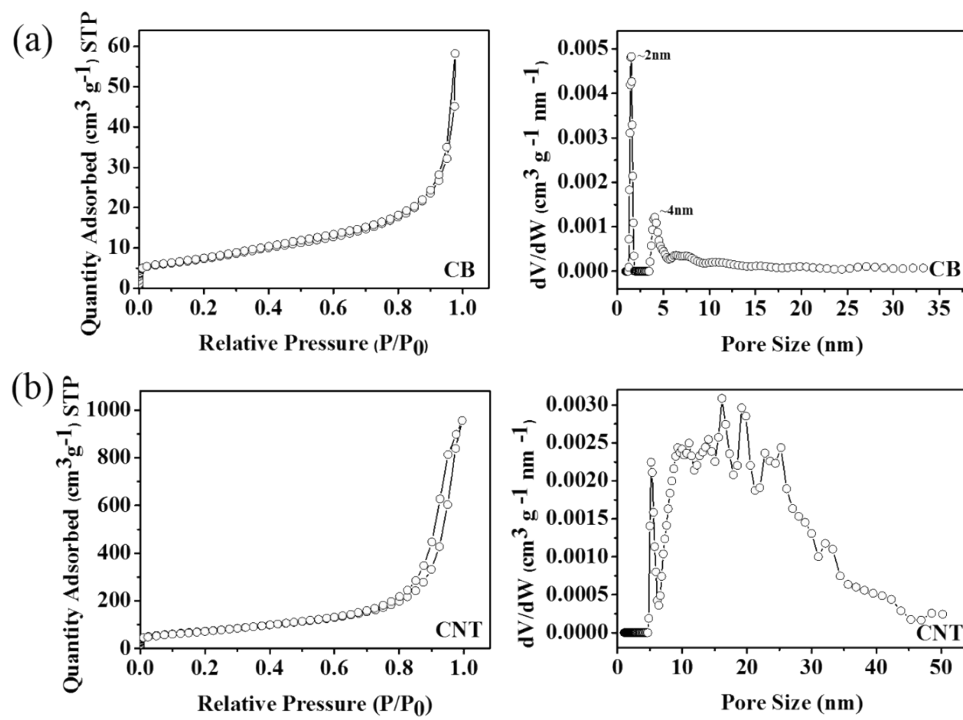

Fig. S2.  $\text{N}_2$  adsorption-desorption isotherm and the pore size distribution of the (a) CB and (b) CNT.

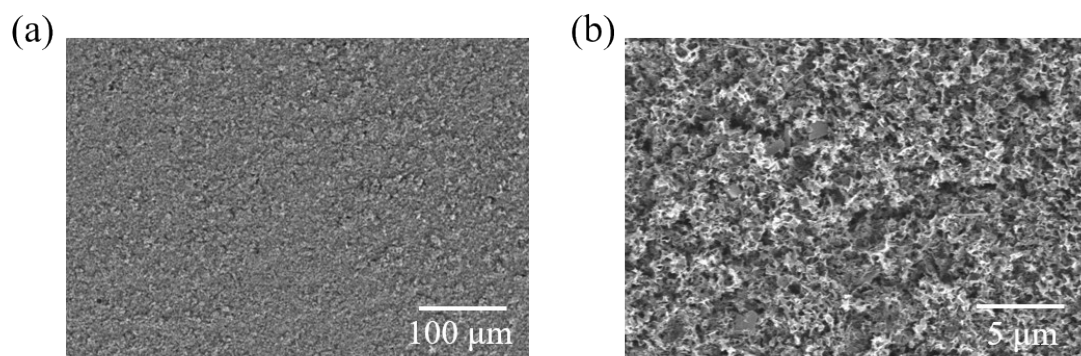

**Fig. S3.** The SEM images of N-GCs modification with (a) 100 μm and (b) 5 μm.

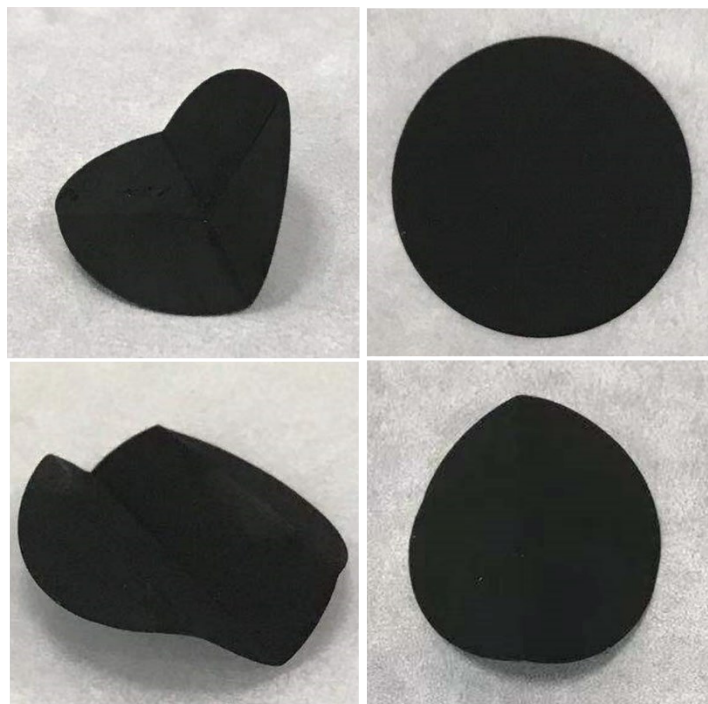

**Fig. S4.** Optical photographs for the N-GCs folded in different directions.

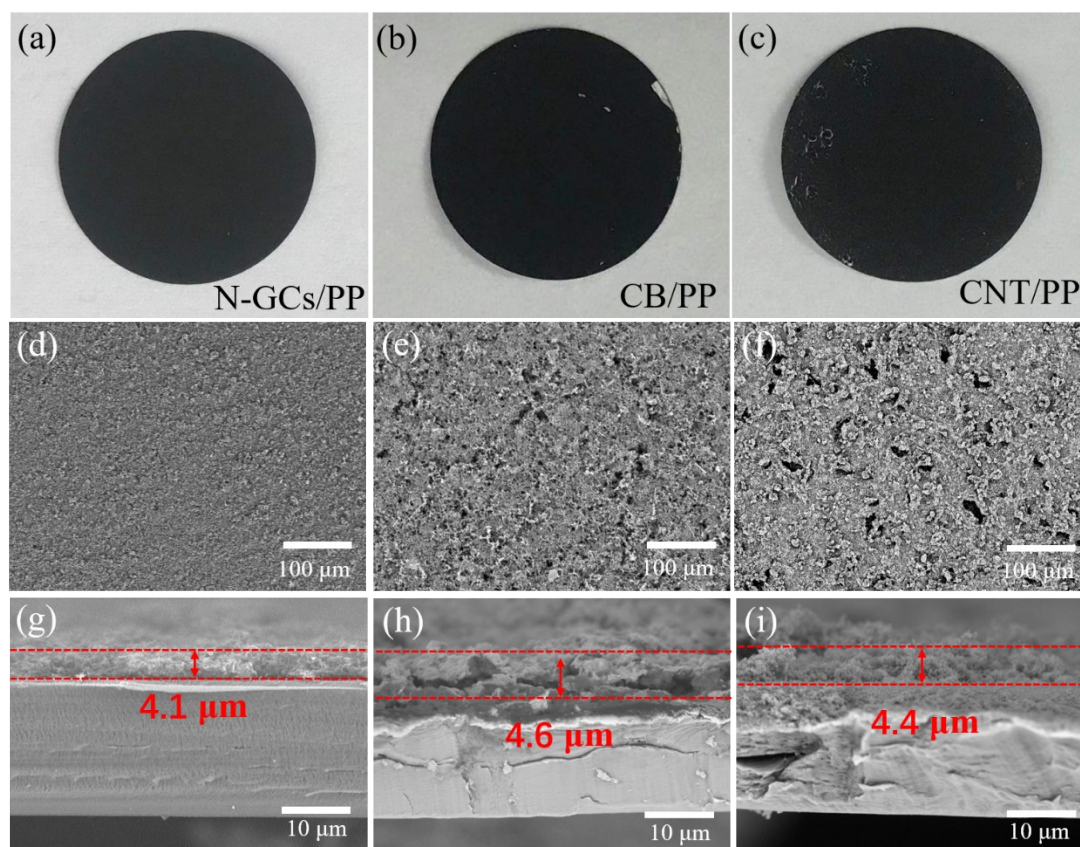

**Fig. S5.** Optical photographs, SEM images of the cathode-side and cross-section SEM images for (a), (d) and (g) N-GCs/PP, (b), (e) and (h) CB/PP, (c), (f) and (i) CNT/PP.

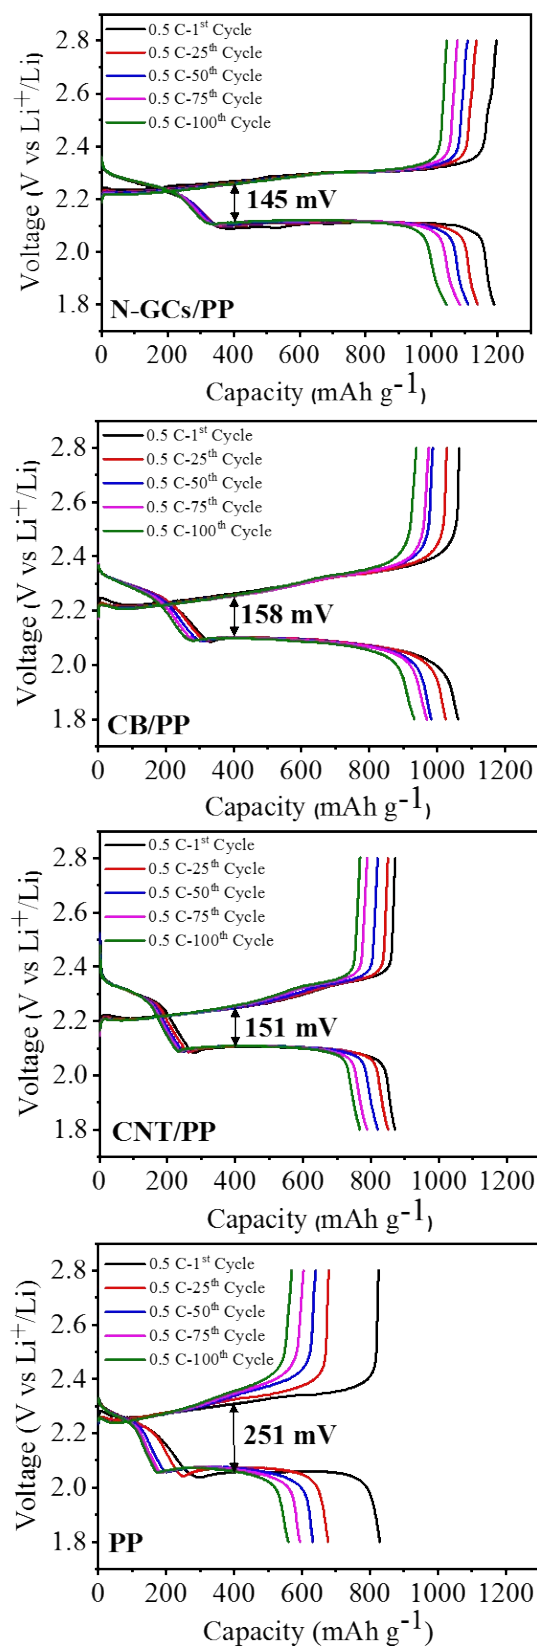

**Fig. S6.** The charge/discharge curves at current rate of 0.5 C for (a) N-GCs/PP cell, (b) CB/PP cell, (c) CNT/PP cell, and (d) PP cell.

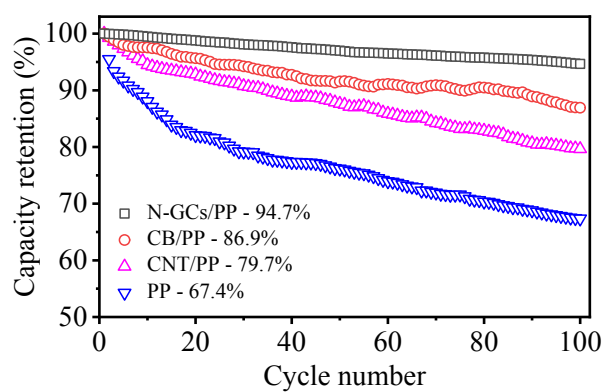

**Fig. S7.** The capacity retention of the upper discharge voltage plateaus for the N-GCs/PP, CB/PP, CNT/PP, and PP four cells at 0.5 C.



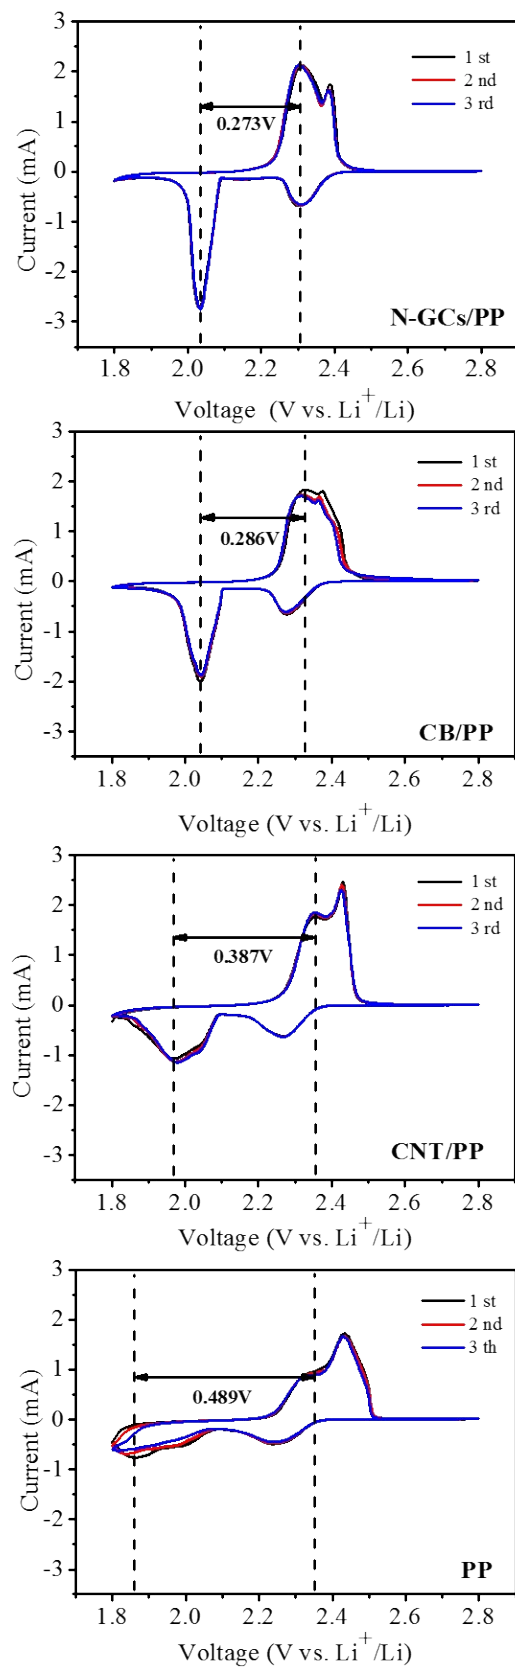

**Fig. S8.** The CV curves cycles at a scan rate of 0.1 mV s<sup>-1</sup> for (a) N-GCs/PP cell, (b) CB/PP cell, (c) CNT/PP cell, and (d) PP cell. (first cycle sieved)

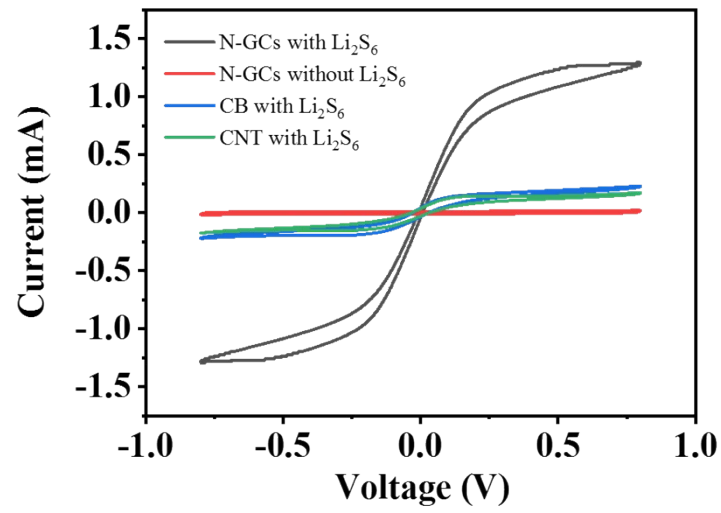

**Fig. S9.** The CV curves cycles of symmetric cells for N-GCs with  $\text{Li}_2\text{S}_6$ , N-GCs without  $\text{Li}_2\text{S}_6$ , CB with  $\text{Li}_2\text{S}_6$ ,

CNT with  $\text{Li}_2\text{S}_6$  at a scan rate of  $5 \text{ mV s}^{-1}$ .

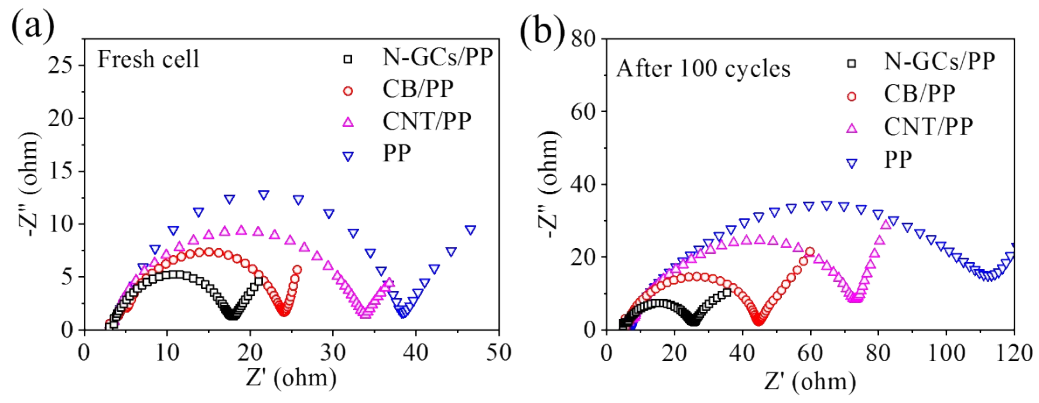

**Fig. S10.** The Nyquist plots of all four cells. (a) before cycling and (b) after 100 cycles at current rate of 0.5 C.

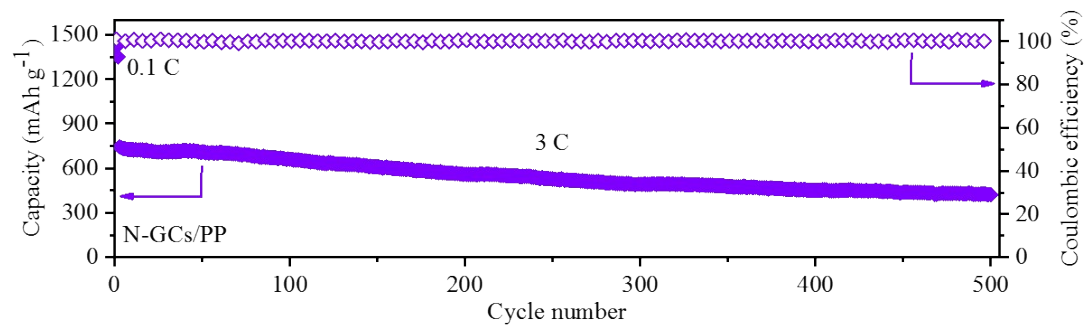

**Fig. S11.** Cycle performances of the N-GCs/PP at 3C.

**Table S1.** Comparison of the capacity maintained at various high current density in this work with the recently reported Li-S batteries[1-20].

| Barrier                         | Coated mass<br>(mg cm <sup>-2</sup> ) | Thickness<br>( $\mu$ m) | Initial capacity<br>(mAh g <sup>-1</sup> ) | Cycles     | Capacity<br>(mAh g <sup>-1</sup> ) | Fading rate<br>(% per cycle) | Ref              |
|---------------------------------|---------------------------------------|-------------------------|--------------------------------------------|------------|------------------------------------|------------------------------|------------------|
| AB-CoS <sub>2</sub>             | 0.5~0.7                               | 12                      | 618 at 2C                                  | 450        | 380                                | 0.09                         | S1               |
| SnS <sub>2</sub>                | 0.6                                   | /                       | 1300 at 0.2C                               | 150        | 1040                               | 0.13                         | S2               |
| B-rGO                           | 0.2~0.3                               | 25                      | 1227.8 at 0.1C                             | 300        | 663.6                              | 0.15                         | S3               |
| AB-SO <sub>3</sub> <sup>-</sup> | 0.13                                  | 6                       | 1262 at 0.1C                               | 100        | 955                                | 0.24                         | S4               |
| CNF-VS <sub>4</sub>             | 0.2~0.4                               | /                       | 1135 at 0.2C                               | 400        | 700                                | 0.095                        | S5               |
| N-MIMEC                         | 0.2                                   | 4                       | 1301 at 0.1C                               | 100        | 971.3                              | 0.25                         | S6               |
| CAF                             | /                                     | 28                      | 1096 at 0.2C                               | 100        | 760.4                              | 0.3                          | S7               |
| LLZTO                           | /                                     | 5.5                     | 649 at 0.5C                                | 500        | 537                                | 0.034                        | S8               |
| PPy nanotube                    | 1                                     | 20                      | 1110.4 at 0.5C                             | 300        | 801.6                              | 0.092                        | S9               |
| CCF                             | 0.3                                   | 3                       | 1215 at 0.5C                               | 250        | 873.5                              | 0.11                         | S10              |
| G-LTO                           | 0.346                                 | 35                      | 801 at 1C                                  | 500        | 697                                | 0.025                        | S11              |
| PG                              | 0.54                                  | 10                      | 1165 at 0.5C                               | 150        | 877                                | 0.16                         | S12              |
| mesoC                           | 0.5                                   | 27                      | 1378 at 0.2C                               | 100        | 1021                               | 0.25                         | S13              |
| PP/GO/Nafion                    | 0.053                                 | /                       | 1057 at 0.5C                               | 200        | 969                                | 0.042                        | S14              |
| CoP nanosphere                  | 0.2                                   | 15.37                   | 928 at 1C                                  | 500        | 550                                | 0.078                        | S15              |
| CoP/C nanocube                  | 0.3                                   | 17.7                    | 938 at 1 C                                 | 500        | 562                                | 0.08                         | S16              |
| KBN                             | 0.43                                  | /                       | 962.4 at 0.2C                              | 150        | 846.9                              | 0.08                         | S17              |
| VS <sub>4</sub> /G              | /                                     | 22.5                    | 1000.0 at 0.5C                             | 500        | 700                                | 0.06                         | S18              |
| MnS/CNF                         | 0.59                                  | 24                      | 1080 at 0.5C                               | 100        | 894                                | 0.17                         | S19              |
| PVDF-HFP+CNF                    | 1.87                                  | 20                      | 1030 at 0.5C                               | 500        | 556.2                              | 0.092                        | S20              |
| <b>N-GC</b>                     | <b>0.075</b>                          | <b>6.5</b>              | <b>1169 at 1C</b>                          | <b>500</b> | <b>845.3</b>                       | <b>0.055</b>                 | <b>This work</b> |

**Table S2.** Productivity of PVP

| Sample | Mass before Carbonization (g) | Mass after Carbonization (g) | Productivity (%) |
|--------|-------------------------------|------------------------------|------------------|
| 1      | 0.1585                        | 0.0399                       | 25.2%            |
| 2      | 0.1249                        | 0.0309                       | 24.7%            |
| 3      | 0.1752                        | 0.0448                       | 25.6%            |
| 4      | 0.1476                        | 0.0361                       | 24.5%            |
| 5      | 0.1552                        | 0.0405                       | 26.1%            |
| 6      | 0.1263                        | 0.0336                       | 26.6%            |
| 7      | 0.1638                        | 0.0421                       | 25.7%            |
| 8      | 0.1522                        | 0.0379                       | 24.9%            |

**Table S3.** BET surface area and pore volume of the N-GC nanosheets, CB and CNT.

| Sample | BET surface area<br>(m <sup>2</sup> g <sup>-1</sup> ) | Total pore volume<br>(cm <sup>3</sup> g <sup>-1</sup> ) |
|--------|-------------------------------------------------------|---------------------------------------------------------|
| N-GC   | 573.2                                                 | 1.36                                                    |
| CB     | 25.5                                                  | 0.062                                                   |
| CNT    | 249.6                                                 | 1.31                                                    |

- [1] J. Balach, T. Jaumann, M. Klose, S. Oswald, J. Eckert, L. Giebeler, *Adv. Funct. Mater.* 25 (2015) 5285-5291.
- [2] X. Chen, X. Ding, C. Wang, Z. Feng, L. Xu, X. Gao, Y. Zhai, D. Wang, *Nanoscale* 10 (2018) 13694-13701.
- [3] X. Chen, Y. Huang, J. Li, X. Wang, Y. Zhang, Y. Guo, J. Ding, L. Wang, *J. Colloid and Interface Sci.* 559 (2020) 13-20.
- [4] J. Lin, K. Zhang, Z. Zhu, R. Zhang, N. Li, C. Zhao, *ACS Appl. Mater. Interfaces* (2019).
- [5] G. Ma, F. Huang, Z. Wen, Q. Wang, X. Hong, J. Jin, X. Wu, *J. Mater. Chem. A* 4 (2016) 16968-16974.
- [6] B. Moorthy, S. Kwon, J.-H. Kim, P. Ragupathy, H.M. Lee, D.K. Kim, *Nanoscale Horiz.* 4 (2019) 214-222.
- [7] H. Qu, J. Ju, B. Chen, N. Xue, H. Du, X. Han, J. Zhang, G. Xu, Z. Yu, X. Wang, G. Cui, *J. Mater. Chem. A*, 6 (2018) 23720-23729.
- [8] M. Rana, M. Li, Q. He, B. Luo, L. Wang, I. Gentle, R. Knibbe, *J. Energy Chem.* 44 (2020) 51-60.
- [9] H. Shao, F. Ai, W. Wang, H. Zhang, A. Wang, W. Feng, Y. Huang, *J. Mater. Chem. A* 5 (2017) 19892-19900.
- [10] H. Shao, B. Huang, N. Liu, W. Wang, H. Zhang, A. Wang, F. Wang, Y. Huang, *J. Mater. Chem. A* 4 (2016) 16627-16634.
- [11] M. Wang, L. Fan, Y. Qiu, D. Chen, X. Wu, C. Zhao, J. Cheng, Y. Wang, N. Zhang, K. Sun, *J. Mater. Chem. A*, 6 (2018) 11694-11699.
- [12] X. Wang, X. Zhao, C. Ma, Z. Yang, G. Chen, L. Wang, H. Yue, D. Zhang, Z. Sun, *J. Mater. Chem. A* (2020).
- [13] F. Wu, J. Qian, R. Chen, Y. Ye, Z. Sun, Y. Xing, L. Li, *J. Mater. Chem. A* 4 (2016) 17033-17041.
- [14] F. Zeng, Z. Jin, K. Yuan, S. Liu, X. Cheng, A. Wang, W. Wang, Y.-s. Yang, *J. Mater. Chem. A*, 4 (2016) 12319-12327.
- [15] P. Zeng, L. Huang, X. Zhang, Y. Han, Y. Chen, *Appl. Surface Sci.* 427 (2018) 242-252.
- [16] P.-Y. Zhai, H.-J. Peng, X.-B. Cheng, L. Zhu, J.-Q. Huang, W. Zhu, Q. Zhang, *Energy Storage Mater.* 7 (2017) 56-63.
- [17] A. Zhang, X. Fang, C. Shen, Y. Liu, I.G. Seo, Y. Ma, L. Chen, P. Cottingham, C. Zhou, *Nano Research* 11 (2018) 3340-3352.
- [18] Y. Zhang, G. Xu, Q. Kang, L. Zhan, W. Tang, Y. Yu, K. Shen, H. Wang, X. Chu, J. Wang, S. Zhao, Y. Wang, L. Ling, S. Yang, *J. Mater. Chem. A* 7 (2019) 16812-16820.
- [19] Y. Zhao, M. Liu, W. Lv, Y.-B. He, C. Wang, Q. Yun, B. Li, F. Kang, Q.-H. Yang, *Nano Energy* 30 (2016) 1-8.
- [20] T.Z. Zhuang, J.Q. Huang, H.J. Peng, L.Y. He, X.B. Cheng, C.M. Chen, Q. Zhang, *Small* 12 (2016) 381-389.
